# Supplementary material for: Microwave assisted fabrication of a nanostructured reduced graphene oxide (rGO)/Fe2O3 composite as a promising next generation energy storage material
Source: Royal Society of Chemistry journal article supplement (doi:10.1039/c6ra24766k), 2016-12-24
Supplement: c6ra24766k1.pdf [file c6ra24766k1.pdf]

## **Supplementary Information**

### **Microwave assisted fabrication of nanostructured reduced graphene oxide (rGO)/Fe<sub>2</sub>O<sub>3</sub> composite as a promising next generation energy storage material**

**Mohit Saraf<sup>a</sup>, Kaushik Natarajan<sup>a</sup> and Shaikh M. Mobin<sup>\*a,b,c</sup>**

<sup>a</sup>Discipline of Metallurgy Engineering and Materials Science, Indian Institute of Technology Indore, Simrol-453552, India

<sup>b</sup>Discipline of Chemistry, School of Basic Sciences, Indian Institute of Technology Indore, Simrol-453552, India

<sup>c</sup>Centre for Bioscience and Biomedical Engineering, Indian Institute of Technology Indore, Simrol-453552, India

\*E-mail: xray@iiti.ac.in

Tel: +91 731 2438 762

## Calculation of parameters

The discharge capacitance ( $C_s$ ) of both the electrodes was calculated by following equation.<sup>1,2</sup>

$$C_s = \frac{I}{m} \times \frac{dt}{dv}$$

Where  $I$  the discharge current in ampere (A) and  $dt/dv$  is the slope inverse of the discharge curve ( $V s^{-1}$ ) and  $m$  is the mass of the active material deposited on the GCE.

The maximum energy density values were calculated from the following equation:

$$E = \frac{1}{2} \times C_s V_i^2$$

Where  $V_i$  is the potential window.<sup>1,2</sup>

The power density was calculated by following equation:

$$P = \frac{E}{\Delta t}$$

Where  $\Delta t$  is the discharge time.

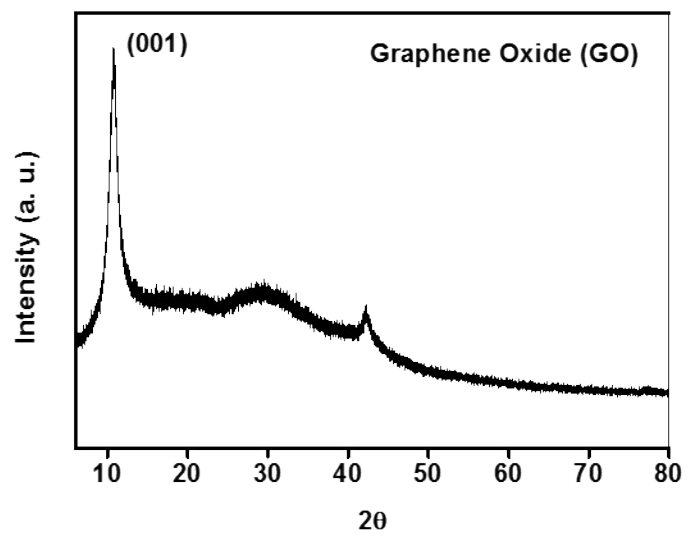

**Fig. S1** XRD spectrum of graphene oxide (GO).

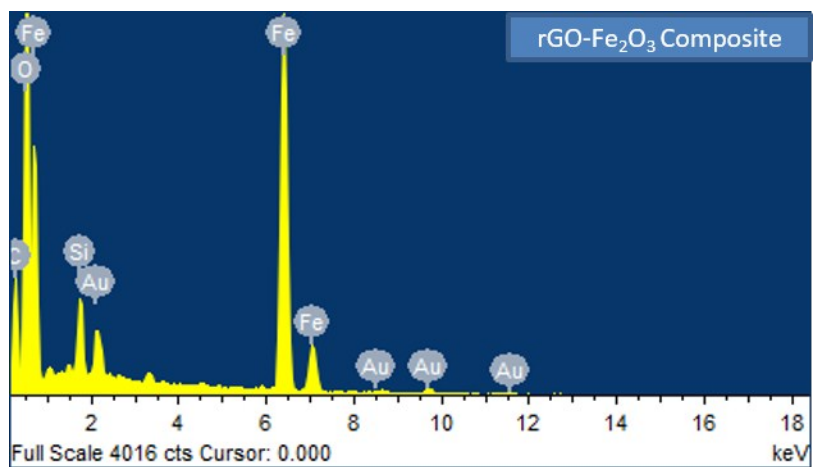

**Fig. S2** EDX spectrum of rGO-Fe<sub>2</sub>O<sub>3</sub> composite.

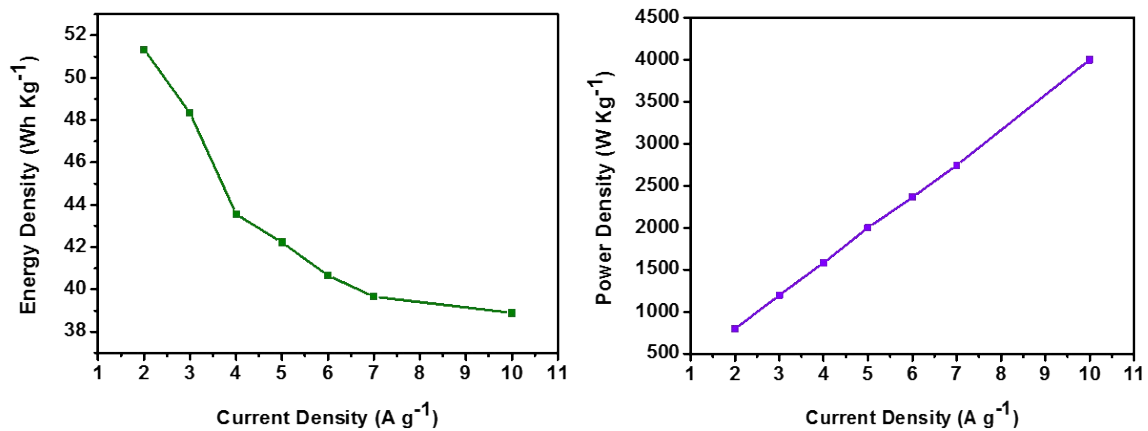

**Fig. S3** Plots between energy and power densities and current density for rGO-Fe<sub>2</sub>O<sub>3</sub>/GCE.

## References

- 1 R. A. Dar, G. A. Naikoo, P. K. Kalambate, L. Giri, F. Khan, S. P. Karna and A. K. Srivastava, *Electrochim. Acta*, 2015, **163**, 196-203.
- 2 M. Saraf, R. A. Dar, K. Natarajan, A. K. Srivastava and S. M. Mobin, *ChemistrySelect*, 2016, **1**, 2826-2833.
